# Supplementary material for: Chained Risk Assessment for Life-Long Disease Burden of Early Exposures–Demonstration of Concept Using Prenatal Maternal Smoking
Source: PubMed Central journal article supplement (PMC7084403; doi:10.3390/ijerph17051472), 2020-02-25
Supplement: ijerph-17-01472-s001.pdf [file ijerph-17-01472-s001.pdf]

# Chained risk assessment for life-long disease burden of early exposures – Demonstration of concept using prenatal maternal smoking

## SUPPLEMENT

Isabell K. Rumrich <sup>1,2\*</sup>; Kirsi Vähäkangas <sup>3</sup>; Matti Viluksela <sup>1,3,4</sup>; Otto Hänninen <sup>2</sup>

<sup>1</sup> University of Eastern Finland (UEF), Department of Environmental and Biological Sciences, Kuopio, Finland

<sup>2</sup> Finnish Institute for Health and Welfare (THL), Department of Public Health Solutions, Kuopio, Finland

<sup>3</sup> University of Eastern Finland (UEF), School of Pharmacy/Toxicology, Kuopio, Finland

<sup>4</sup> Finnish Institute for Health and Welfare (THL), Department of Health Security, Kuopio, Finland

\* corresponding author: Email: [isabell.rumrich@thl.fi](mailto:isabell.rumrich@thl.fi); National Institute for Health and Welfare (THL), Department of Public Health Solutions, P.O. Box 95, 70701 Kuopio, Finland; telephone: +358 29 524 7030

## Literature search

### Literature review Maternal smoking

Database: PubMed

Date: 24 October 2018

Query: (Smoking[mh] OR tobacco smoke pollution[mh]) AND ((maternal exposure[mh] OR "maternal-fetal exchange"[mh] OR maternal behavior[mh] OR pregnancy[mh] OR "prenatal exposure delayed effects"[mh] OR pregnancy outcome[mh] OR fetal development[mh]) OR ((infant[mh] OR "infant, newborn"[mh] OR mothers[mh] OR female[mh] OR "newborn"[mh]) AND (pregnan\* OR in utero OR antepartum OR prenatal\* OR pre-natal OR peripartum OR perinatal OR perinat\* OR intrapartum OR postnat\* OR postpartum OR fetal OR fetus OR foetus OR neonat\*)))

Filter: Article Type Meta-Analysis, Review

### Literature review preterm birth & Literature review low birth weight

Database: PubMed

Date: 3 October 2018

Query: ((birth) AND (weight OR preterm OR premature)) AND risk) AND meta-analysis

### Literature review childhood overweight and obesity

Database: PubMed

Date: 30 November 2018

Query: : (((child[Title/Abstract] OR children[Title/Abstract] OR childhood[Title/Abstract] OR adolescen\*[Title/Abstract] OR teen\*[Title/Abstract])) AND (weight[Title/Abstract] OR overweight[Title/Abstract] OR obes\*[Title/Abstract] OR BMI[Title/Abstract] OR fat[Title/Abstract] OR (body composition)[Title/Abstract])) AND (risk[Title/Abstract] OR association[Title/Abstract] OR effect[Title/Abstract])) AND meta-analysis[Title/Abstract]

## References from the literature review included in BoD estimation

- Bhutta AT, Cleves MA, Casey PH, Cradock MM, Anand KJ. Cognitive and behavioral outcomes of school-aged children who were born preterm: a meta-analysis. *JAMA*. 2002 Aug 14;288(6):728-37.
- Burke H, Leonardi-Bee J, Hashim A, Pine-Abata H, Chen Y, Cook DG, Britton JR, McKeever TM. Prenatal and passive smoke exposure and incidence of asthma and wheeze: systematic review and meta-analysis. *Pediatrics*. 2012 Apr;129(4):735-44. doi: 10.1542/peds.2011-2196. Epub 2012 Mar 19. Review. PubMed PMID: 22430451.
- Chu A, Heck JE, Ribeiro KB, Brennan P, Boffetta P, Buffler P, Hung RJ. Wilms' tumour: a systematic review of risk factors and meta-analysis. *Paediatr Perinat Epidemiol*. 2010 Sep;24(5):449-69.
- Cook MB, Akre O, Forman D, Madigan MP, Richiardi L, McGlynn KA. A systematic review and meta-analysis of perinatal variables in relation to the risk of testicular cancer—experiences of the son. *Int J Epidemiol*. 2010;39:1605–18.
- Cortese S, Moreira-Maia CR, St Flur D, Morcillo-Penalver C, Rohde LA, Faraone SV. Association between ADHD and obesity: a systematic review and meta-analysis. *Am J Psychiatry*. 2016; 173: 34-43.
- den Dekker HT, Sonnenschein-van der Voort AMM, de Jongste JC, Anessi-Maesano I, Arshad SH, et al.. Early growth characteristics and the risk of reduced lung function and asthma: A meta-analysis of 25,000 children. *J Allergy Clin Immunol*. 2016 Apr;137(4):1026-1035.
- Gardener H, Spiegelman D, Buka SL. Perinatal and neonatal risk factors for autism: a comprehensive meta-analysis. *Pediatrics*. 2011 Aug;128(2):344-55.
- Hackshaw A, Rodeck C, Boniface S. Maternal smoking in pregnancy and birth defects: a systematic review based on 173 687 malformed cases and 11.7 million controls. *Hum Reprod Update*. 2011 Sep-Oct;17(5):589-604. doi: 10.1093/humupd/dmr022. Epub 2011 Jul 11. Review. PubMed PMID: 21747128; PubMed Central PMCID: PMC3156888.
- Harder T, Rodekamp E, Schellong K, Dudenhausen JW, Plagemann A. Birth weight and subsequent risk of type 2 diabetes: a meta-analysis. *Am J Epidemiol*. 2007;165:849–57.
- Hidayat K, Du X, Shi B-M. Body fatness at a young age and risks of eight types of cancer: systematic review and meta-analysis of observational studies. *Obesity Reviews*. 2018; 19: 1385-1394.
- Huang QT, Gao YF, Zhong M, Yu YH. Preterm Birth and Subsequent Risk of Acute Childhood Leukemia: a Meta-Analysis of Observational Studies. *Cell Physiol Biochem*. 2016;39(3):1229-38.
- Huang J, Zhu T, Qu Y, Mu D. Prenatal, Perinatal and Neonatal Risk Factors for Intellectual Disability: A Systemic Review and Meta-Analysis. *PLoS One*. 2016 Apr 25;11(4):e0153655.
- Lee LJ, Lupo PJ. Maternal smoking during pregnancy and the risk of congenital heart defects in offspring: a systematic review and metaanalysis. *Pediatr Cardiol*. 2013 Feb;34(2):398-407. doi: 10.1007/s00246-012-0470-x. Epub 2012 Aug 12. Review. PubMed PMID: 22886364.
- Li S, Xi B. Preterm birth is associated with risk of essential hypertension in later life. *Int J Cardiol*. 2014 Mar 15;172(2):e361-3.
- Li S, Zhang M, Tian H, Liu Z, Yin X, Xi B. Preterm birth and risk of type 1 and type 2 diabetes: systematic review and meta-analysis. *Obes Rev*. 2014 Oct;15(10):804-11.

- Llewellyn A, Simmonds M, Owen SG, Woolacott N. Childhood obesity as a predictor of morbidity in adulthood: a systematic review and meta-analysis. *Obesity Reviews*. 2016; 17: 56-67.
- Mannan M, Mamun A, Doi S, Clavarino A. Prospective associations between depression and obesity for adolescent males and females - A systematic review and meta-analysis of longitudinal studies. *Plos One*. 2016; 11(6): e0157240.
- Mebrahtu TF, Feltbower RG, Greenwood DC, Parslow RC. Childhood body mass index and wheezing disorders: a systematic review and meta-analysis. *Pediatr Allergy Immunol*. 2015; 26: 62-72.
- Mu M, Ye S, Bai M-J, Liu G-L, Tong Y, Wang S-F, et al.. Birth weight and subsequent risk of asthma: a systematic review and meta-analysis. *Heart Lung Circ*. 2014;23:511-9.
- Nicoletti D, Appel LD, Siedersberger Neto P, Guimarães GW, Zhang L. Maternal smoking during pregnancy and birth defects in children: a systematic review with meta-analysis. *Cad Saude Publica*. 2014 Dec;30(12):2491-529. doi: 10.1590/0102-311X00115813. Review. English, Portuguese. PubMed PMID: 26247979.
- Orgel E, Genkinger JM, Aggarwal D, Sung L, Nieder M, Ladas E. Association of body mass index and survival in pediatric leukemia: a meta-analysis. *Am J Clin Nutr*. 2016; 103: 808-817.
- Rayfield S and Plugge E. 2017. Systematic review and meta-analyses of the association between maternal smoking in pregnancy and childhood overweight and obesity. *J Epidemiol Community Health*, 71: 162-173.
- Rosenboom T, de Rooij S Painter R, 2006. The Dutch famine and its long-term consequences for adult health. *Early Human Development* 82:485-491.
- Rumrich IK, Viluksela M, Vähäkangas K, Gissler M, Surcel HM, Hänninen O. Maternal Smoking and the Risk of Cancer in Early Life - A Meta-Analysis. *PLoS One*. 2016 Nov 8;11(11):e0165040. doi: 10.1371/journal.pone.0165040. eCollection 2016. PubMed PMID: 27824869; PubMed Central PMCID: PMC5100920.
- Wang S-F, Shu L, Sheng J, Mu M, Wang S, Tao X-Y, et al.. Birth weight and risk of coronary heart disease in adults: a meta-analysis of prospective cohort studies. *J Dev Orig Health Dis*. 2014;5:408-19.
- Wang C, Geng H, Liu W, Zhang G. Prenatal, perinatal, and postnatal factors associated with autism: A meta-analysis. *Medicine (Baltimore)*. 2017 May;96(18):e6696.
- White SL, Perkovic V, Cass A, Chang CL, Poulter NR, Spector T, et al.. Is low birth weight an antecedent of CKD in later life? A systematic review of observational studies. *Am J Kidney Dis*. 2009;54:248-61.
- Wojcik W, Lee W, Colman I, Hardy R, Hotopf M. Foetal origins of depression? A systematic review and meta-analysis of low birth weight and later depression. *Psychol Med*. 2013;43:1-12.
- Yan K, Xu X, Liu X, Wang X, Hua S, Wang C, Liu X. The associations between maternal factors during pregnancy and the risk of childhood acute lymphoblastic leukemia: A meta-analysis. *Pediatr Blood Cancer*. 2015 Jul;62(7):1162-70. doi: 10.1002/pbc.25443. Epub 2015 Mar 1. Erratum in: *Pediatr Blood Cancer*. 2016 May;63(5):953-4. PubMed PMID: 25728190.

**Table S1.Characteristics of meta-analyses included in this work**

|    | Endpoint                                 | Exposure | Pooled risk estimate | 95% CI    | # studies | Follow up time | Reference              |
|----|------------------------------------------|----------|----------------------|-----------|-----------|----------------|------------------------|
|    | Congenital anomalies                     |          |                      |           |           |                |                        |
| 1  | Heart                                    | MS       | 1.11                 | 1.02-1.21 | 19        | na             | Lee et al. 2013        |
| 2  | Oral clefts                              | MS       | 1.28                 | 1.2-1.36  | 38        | na             | Hackshaw et al. 2011   |
| 3  | Digestive system                         | MS       | 1.18                 | 1.07-1.3  | 22        | na             | Nicoletti et al. 2014  |
| 4  | Musculoskeletal system                   | MS       | 1.27                 | 1.16-1.39 | 48        | na             | Nicoletti et al. 2014  |
|    | Cancer                                   |          |                      |           |           |                |                        |
| 5  | Acute leukemia                           | PTB      | 1.09                 | 1.02-1.17 | 12        | <15            | Huang et al. 2016a     |
| 6  | Acute myeloid leukemia                   | PTB      | 1.42                 | 1.21-1.67 | 7         | <15            | Huang et al. 2016a     |
| 7  | Acute lymphoblastic leukemia             | MS       | 1.1                  | 1.02-1.19 | 21        | <15            | Yan et al. 2015        |
|    |                                          | OW       | 1.35                 | 1.2-1.51  | 6         | <22 years      | Orgel et al. 2016      |
|    |                                          | OB       |                      |           |           |                |                        |
| 8  | Lymphoma                                 | MS       | 1.21                 | 1.05-1.36 | 6         | <20            | Rumrich et al. 2016    |
| 9  | Non Hodgkin lymphoma                     | MS       | 1.27                 | 1.07-1.48 | 5         | <20            | Rumrich et al. 2016    |
| 10 | Nervous system cancer                    | MS       | 1.09                 | 1.02-1.17 | 22        | <20            | Rumrich et al. 2016    |
| 11 | Testicular cancer                        | LBW      | 1.34                 | 1.08-1.67 | 17        | na             | Cook et al. 2010       |
| 12 | Wilms' tumor                             | PTB      | 1.44                 | 1.14-1.81 | 6         | <15            | Chu et al. 2010        |
| 13 | Oesophageal adenocarcinoma               | OW       | 1.93                 | 1.39-2.68 | 7         | >30            | Hidayat et al. 2018    |
|    |                                          | OB       | 3.63                 | 1.9-6.89  | 7         | >30            |                        |
| 14 | Hepatocellular carcinoma                 | OW       | 1.33                 | 1.14-1.54 | 4         | >30            | Hidayat et al. 2018    |
|    |                                          | OB       | 1.74                 | 1.28-2.32 | 4         | >30            |                        |
| 15 | Multiple myeloma                         | OW       | 1.24                 | 1.16-1.32 | 7         | >30            | Hidayat et al. 2018    |
|    |                                          | OB       | 1.53                 | 1.33-1.71 | 7         | >30            |                        |
| 16 | Pancreas cancer                          | OW       | 1.18                 | 1.12-1.22 | 10        | >30            | Hidayat et al. 2018    |
|    |                                          | OB       | 1.38                 | 1.24-1.48 | 10        | >30            |                        |
| 17 | Renal cell cancer                        | OW       | 1.23                 | 1.17-1.29 | 12        | >30            | Hidayat et al. 2018    |
|    |                                          | OB       | 1.50                 | 1.35-1.66 | 12        | >30            |                        |
| 18 | Thyroid cancer                           | OW       | 1.13                 | 1.07-1.18 | 7         | >30            | Hidayat et al. 2018    |
|    |                                          | OB       | 1.26                 | 1.15-1.38 | 7         | >30            |                        |
|    | Cardiovascular                           |          |                      |           |           |                |                        |
| 19 | Coronary heart disease                   | LBW      | 1.22                 | 1.13-1.31 | 16        | adult          | Wang et al. 2014       |
|    |                                          | OW       | 1.10                 | 1.07-1.15 | 4         | adult          | Llewellyn et al. 2016  |
|    |                                          | OB       | 1.21                 | 1.14-1.32 | 4         | adult          |                        |
| 20 | Essential hypertension                   | PTB      | 1.31                 | 1.2-1.43  | 8         | na             | Li et al. 2014a        |
|    |                                          | OW       | 1.53                 | 1.33-1.75 | 2         | adult          | Llewellyn et al. 2016  |
|    |                                          | OB       | 2.28                 | 1.76-2.98 | 2         | adult          |                        |
| 21 | Stroke                                   | OW       | 1.35                 | 1.17-1.56 | 1         | adult          | Llewellyn et al. 2016  |
|    |                                          | OB       | 1.81                 | 1.36-2.4  | 1         | adult          |                        |
|    | Cognitive                                |          |                      |           |           |                |                        |
| 22 | Intellectual disability                  | PTB      | 2.03                 | 1.79-2.31 | 7         | na             | Huang et al. 2016b     |
|    | Mental                                   |          |                      |           |           |                |                        |
| 23 | Depression in adulthood                  | LBW      | 1.15                 | 1-1.32    | 18        | adult          | Wojcik et al. 2013     |
| 24 | Depression                               | OB       | 1.4                  | 1.16-1.7  | 7         | 11-15 (mean)   | Mannan et al. 2016     |
| 25 | Autism                                   | LBW      | 1.63                 | 1.19-2.33 | 15        | na             | Gardener et al. 2011   |
|    |                                          | PTB      | 1.31                 | 1.16-1.48 | 10        | child          | Wang et al. 2017       |
| 26 | Attention Deficit/Hyperactivity Disorder | PTB      | 2.64                 | 1.85-3.78 | 7         | <15            | Bhutta et al. 2002     |
|    |                                          | OB       | 1.2                  | 1.05-1.37 | 30        | na             | Cortese et al. 2016    |
|    | Respiratory                              |          |                      |           |           |                |                        |
| 27 | Asthma infant                            | MS       | 1.85                 | 1.35-2.53 | 5         | <3 years       | Burke et al. 2012      |
| 28 | Asthma childhood + adolescent            | MS       | 1.23                 | 1.12-1.36 | 8         | 5--18          | Burke et al. 2012      |
| 29 | Asthma in childhood                      | LBW      | 1.32                 | 1.07-1.62 | 24        | <10            | den Dekker et al. 2016 |
|    |                                          | PTB      | 1.34                 | 1.15-1.57 | 24        | <10            | den Dekker et al. 2016 |
|    |                                          | OW       | 1.23                 | 1.17-1.29 | 28        | <10            | Mebrahtu et al. 2015   |
|    |                                          | OB       | 1.46                 | 1.36-1.57 | 21        | <10            |                        |
| 30 | Asthma in adulthood                      | LBW      | 1.25                 | 1.21-1.4  | 4         | adult          | Mu et al. 2014         |
|    | Metabolic                                |          |                      |           |           |                |                        |
| 31 | Diabetes                                 | OW       | 2.41                 | 1.54-3.75 | 6         | adult          | Llewellyn et al. 2016  |
|    |                                          | OB       | 5.60                 | 2.34-13.3 | 6         | adult          |                        |
| 32 | Type 1 diabetes mellitus                 | PTB      | 1.18                 | 1.11-1.25 | 18        | all            | Li et al. 2014b        |
| 33 | Type 2 diabetes mellitus                 | LBW      | 1.32                 | 1.06-1.64 | 10        | all            | Harder et al. 2007     |
|    |                                          | PTB      | 1.51                 | 1.32-1.72 | 5         | all            | Li et al. 2014b        |
|    | Other                                    |          |                      |           |           |                |                        |
| 34 | Chronic kidney disease                   | LBW      | 1.73                 | 1.44-2.08 | 21        | na             | White et al. 2009      |

OR: Odds ratio; MS Maternal smoking; PTB Preterm birth; LBW Low birth weight; OW childhood overweight; OB childhood obesity

**Table S2. Endpoints and associated population attributable fractions included in this work**

| Literature endpoint                      | GBD endpoint                                     | Background BoD |                 | Maternal smoking |              |                       | Preterm birth (quit) |              |                        | Low birth weight (cont) |              |                        | Low birth weight (quit) |       |              | Childhood overweight   |                   |             | Childhood obesity     |                       |                   |                       |                       |
|------------------------------------------|--------------------------------------------------|----------------|-----------------|------------------|--------------|-----------------------|----------------------|--------------|------------------------|-------------------------|--------------|------------------------|-------------------------|-------|--------------|------------------------|-------------------|-------------|-----------------------|-----------------------|-------------------|-----------------------|-----------------------|
|                                          |                                                  | DALY           | 95%CI           | PAF              | 95%CI        | Reference             | PAF                  | 95%CI        | Reference              | PAF                     | 95%CI        | Reference              | PAF                     | 95%CI | Reference    | PAF                    | 95%CI             | Reference   | PAF                   | 95%CI                 | Reference         |                       |                       |
| <b>Congenital anomalies</b>              |                                                  |                |                 |                  |              |                       |                      |              |                        |                         |              |                        |                         |       |              |                        |                   |             |                       |                       |                   |                       |                       |
| Heart                                    | Congenital heart anomalies                       | 2,653          | (2086-3375)     | 0.01             | (0.001-0.01) | Lee et al. 2013       |                      |              |                        |                         |              |                        |                         |       |              |                        |                   |             |                       |                       |                   |                       |                       |
| Oral clefts                              | Orofacial clefts                                 | 240            | (155-355)       | 0.02             | (0.014-0.02) | Hackshaw et al. 2011  |                      |              |                        |                         |              |                        |                         |       |              |                        |                   |             |                       |                       |                   |                       |                       |
| Digestive system                         | Digestive congenital anomalies                   | 2,577          | (1777-3555)     | 0.01             | (0.005-0.02) | Nicoletti et al. 2014 |                      |              |                        |                         |              |                        |                         |       |              |                        |                   |             |                       |                       |                   |                       |                       |
| Musculoskeletal system                   | Congenital musculoskeletal and limb              | 3,123          | (2150-4271)     | 0.02             | (0.011-0.03) | Nicoletti et al. 2014 |                      |              |                        |                         |              |                        |                         |       |              |                        |                   |             |                       |                       |                   |                       |                       |
| <b>Cancer</b>                            |                                                  |                |                 |                  |              |                       |                      |              |                        |                         |              |                        |                         |       |              |                        |                   |             |                       |                       |                   |                       |                       |
| Acute leukemia                           | Acute myeloid leukemia + Acute lymphoid leukemia | 806            | (664-977)       |                  |              |                       | 0.00                 | (0.001-0.01) | Huang et al. 2016a     |                         |              |                        |                         |       |              |                        |                   |             |                       |                       |                   |                       |                       |
| Acute myeloid leukemia                   | Acute myeloid leukemia                           | 238            | (189-294)       |                  |              |                       | 0.02                 | (0.008-0.03) | Huang et al. 2016a     |                         |              |                        |                         |       |              |                        |                   |             |                       |                       |                   |                       |                       |
| Acute lymphoblastic leukemia             | Acute lymphoid leukemia                          | 568            | (475-683)       | 0.01             | (0.001-0.01) | Yan et al. 2015       |                      |              |                        |                         |              |                        |                         |       | 0.05         | (0.03-0.07)            | Orgel et al. 2016 |             | 0.01                  | (0.006-0.02)          | Orgel et al. 2016 |                       |                       |
| Lymphoma                                 | Hodgkin lymphoma + Non-Hodgkin lymphoma          | 238            | (190-293)       | 0.01             | (0.003-0.02) | Rumrich et al. 2016   |                      |              |                        |                         |              |                        |                         |       |              |                        |                   |             |                       |                       |                   |                       |                       |
| Non Hodgkin lymphoma                     | Non-Hodgkin lymphoma                             | 191            | (158-230)       | 0.02             | (0.005-0.03) | Rumrich et al. 2016   |                      |              |                        |                         |              |                        |                         |       |              |                        |                   |             |                       |                       |                   |                       |                       |
| Nervous system cancer                    | Brain and nervous system cancer                  | 832            | (678-1108)      | 0.01             | (0.001-0.01) | Rumrich et al. 2016   |                      |              |                        |                         |              |                        |                         |       |              |                        |                   |             |                       |                       |                   |                       |                       |
| Testicular cancer                        | Testicular cancer                                | 11             | (7-16)          |                  |              |                       |                      |              |                        | 0.01                    | (0.002-0.02) | Cook et al. 2010       |                         | 0.01  | (0.002-0.02) | Cook et al. 2010       |                   |             |                       |                       |                   |                       |                       |
| Wilms' tumor                             | Kidney cancer                                    | 95             | (77-119)        |                  |              |                       | 0.02                 | (0.006-0.03) | Chu et al. 2010        |                         |              |                        |                         |       |              |                        | 0.03              | (0.02-0.04) | Hidayat et al. 2018   | 0.01                  | (0.01-0.02)       | Hidayat et al. 2018   |                       |
| Oesophageal adenocarcinoma               | Esophageal cancer                                | 5,027          | (4615-5478)     |                  |              |                       |                      |              |                        |                         |              |                        |                         |       |              |                        | 0.12              | (0.05-0.19) | Hidayat et al. 2018   | 0.07                  | (0.03-0.15)       | Hidayat et al. 2018   |                       |
| Hepatocellular carcinoma                 | Liver cancer                                     | 8,725          | (7978-9552)     |                  |              |                       |                      |              |                        |                         |              |                        |                         |       |              |                        | 0.04              | (0.02-0.07) | Hidayat et al. 2018   | 0.02                  | (0.008-0.04)      | Hidayat et al. 2018   |                       |
| Multiple myeloma                         | Multiple myeloma                                 | 5,352          | (4661-6495)     |                  |              |                       |                      |              |                        |                         |              |                        |                         |       |              |                        | 0.03              | (0.02-0.04) | Hidayat et al. 2018   | 0.02                  | (0.01-0.02)       | Hidayat et al. 2018   |                       |
| Pancreas cancer                          | Pancreatic cancer                                | 21,360         | (19765-23025)   |                  |              |                       |                      |              |                        |                         |              |                        |                         |       |              |                        | 0.02              | (0.02-0.03) | Hidayat et al. 2018   | 0.01                  | (0.007-0.01)      | Hidayat et al. 2018   |                       |
| Thyroid cancer                           | Thyroid cancer                                   | 1,182          | (1053-1324)     |                  |              |                       |                      |              |                        |                         |              |                        |                         |       |              |                        | 0.02              | (0.01-0.02) | Hidayat et al. 2018   | 0.01                  | (0.004-0.01)      | Hidayat et al. 2018   |                       |
| <b>Cardiovascular</b>                    |                                                  |                |                 |                  |              |                       |                      |              |                        |                         |              |                        |                         |       |              |                        |                   |             |                       |                       |                   |                       |                       |
| Coronary heart disease                   | Ischemic heart disease                           | 157,588        | (147569-172367) |                  |              |                       |                      |              |                        | 0.01                    | (0.004-0.01) | Wang et al. 2014       |                         | 0.01  | (0.004-0.01) | Wang et al. 2014       |                   | 0.01        | (0.009-0.02)          | Llewellyn et al. 2016 | 0.01              | (0.004-0.01)          | Llewellyn et al. 2016 |
| Essential hypertension                   | Hypertensive heart disease                       | 12,532         | (6245-14421)    |                  |              |                       | 0.01                 | (0.008-0.02) | Li et al. 2014         |                         |              |                        |                         |       |              |                        | 0.07              | (0.04-0.09) | Llewellyn et al. 2016 | 0.04                  | (0.02-0.06)       | Llewellyn et al. 2016 |                       |
| Stroke                                   | Stroke                                           | 71,952         | (65505-78747)   |                  |              |                       |                      |              |                        |                         |              |                        |                         |       |              |                        | 0.05              | (0.02-0.07) | Llewellyn et al. 2016 | 0.02                  | (0.01-0.04)       | Llewellyn et al. 2016 |                       |
| <b>Cognitive</b>                         |                                                  |                |                 |                  |              |                       |                      |              |                        |                         |              |                        |                         |       |              |                        |                   |             |                       |                       |                   |                       |                       |
| Intellectual disability                  | Idiopathic developmental intellectual disability | 1,059          | (317-1947)      |                  |              |                       | 0.04                 | (0.03-0.05)  | Huang et al. 2016b     |                         |              |                        |                         |       |              |                        |                   |             |                       |                       |                   |                       |                       |
| <b>Mental</b>                            |                                                  |                |                 |                  |              |                       |                      |              |                        |                         |              |                        |                         |       |              |                        |                   |             |                       |                       |                   |                       |                       |
| Depression in adulthood                  | Major depressive disorder                        | 292            | (242-355)       |                  |              |                       |                      |              |                        | 0.00                    | (0-0.01)     | Wojcik et al. 2013     |                         | 0.00  | (0-0.01)     | Wojcik et al. 2013     |                   |             |                       |                       | 0.01              | (0.005-0.02)          | Mannan et al. 2016    |
| Autism                                   | Autism spectrum disorders                        | 4,528          | (3095-6269)     |                  |              |                       | 0.01                 | (0.01-0.02)  | Wang et al. 2017       | 0.02                    | (0.006-0.04) | Gardener et al. 2011   |                         | 0.02  | (0.006-0.04) | Gardener et al. 2011   |                   |             |                       |                       |                   |                       |                       |
| Attention Deficit/Hyperactivity Disorder | Attention-deficit/hyperactivity disorder         | 703            | (420-1117)      |                  |              |                       | 0.06                 | (0.03-0.1)   | Bhutta et al. 2002     |                         |              |                        |                         |       |              |                        |                   |             |                       | 0.01                  | (0.001-0.01)      | Cortese et al. 2016   |                       |
| <b>Respiratory</b>                       |                                                  |                |                 |                  |              |                       |                      |              |                        |                         |              |                        |                         |       |              |                        |                   |             |                       |                       |                   |                       |                       |
| Asthma infant                            | Asthma                                           | 0              | (0-0)           | 0.06             | (0.02-0.1)   | Burke et al. 2012     |                      |              |                        |                         |              |                        |                         |       |              |                        |                   |             |                       |                       |                   |                       |                       |
| Asthma childhood + adolescent            | Asthma                                           | 2,483          | (1522-3695)     | 0.02             | (0.008-0.02) | Burke et al. 2012     |                      |              |                        |                         |              |                        |                         |       |              |                        |                   |             |                       |                       |                   |                       |                       |
| Asthma in adulthood                      | Asthma                                           | 11,326         | (8193-15233)    |                  |              |                       |                      |              |                        | 0.01                    | (0.006-0.01) | Mu et al. 2014         |                         | 0.01  | (0.006-0.01) | Mu et al. 2014         |                   |             |                       |                       |                   |                       |                       |
| Asthma in childhood                      | Asthma                                           | 1,065          | (604-1698)      |                  |              |                       | 0.01                 | (0.006-0.02) | den Dekker et al. 2016 | 0.01                    | (0.002-0.02) | den Dekker et al. 2016 |                         | 0.01  | (0.002-0.02) | den Dekker et al. 2016 |                   | 0.03        | (0.02-0.04)           | Mebrabtu et al. 2015  | 0.01              | (0.01-0.02)           | Mebrabtu et al. 2015  |
| <b>Other</b>                             |                                                  |                |                 |                  |              |                       |                      |              |                        |                         |              |                        |                         |       |              |                        |                   |             |                       |                       |                   |                       |                       |
| Chronic kidney disease                   | Chronic kidney disease                           | 11,807         | (10306-13608)   |                  |              |                       |                      |              |                        | 0.02                    | (0.01-0.03)  | White et al. 2009      |                         | 0.02  | (0.01-0.03)  | White et al. 2009      |                   |             |                       |                       |                   |                       |                       |
